# Supplementary material for: Prevalence and progression of chronic kidney disease among adults undergoing creatinine testing in South African public healthcare facilities: a study leveraging data from South Africa’s National Health Laboratory Service (NHLS)
Source: PubMed Central journal article supplement — BMJ Public Health. 2024 Jul 31;2(1):e000799. doi: 10.1136/bmjph-2023-000799 (PMC11654635; doi:10.1136/bmjph-2023-000799), 2024-07-31
Supplement: NIHMS2026727-supplement-Supplemental_Material.pdf [file NIHMS2026727-supplement-Supplemental_Material.pdf]

**Supplemental Table 1.** Kidney function status of all individuals with a serum creatinine laboratory test available between January 1, 2012, and January 1, 2016.

| CKD Status                                                                               | N<br>(Total=6,106,521) <sup>a</sup> | %    |
|------------------------------------------------------------------------------------------|-------------------------------------|------|
| Normal <sup>b</sup>                                                                      | 5,607,287                           | 91.8 |
| CKD <sup>c</sup>                                                                         | 88,273                              | 1.5  |
| RI event with no follow-up lab within 3-12 months <sup>d</sup>                           | 142,104                             | 2.3  |
| RI event with follow-up lab < 60 L/min/1.73m <sup>2</sup> within 0-3 months <sup>d</sup> | 152,320                             | 2.5  |
| RI event with follow-up lab ≥ 60 L/min/1.73m <sup>2d</sup>                               | 116,537                             | 1.9  |

<sup>a</sup>Total N represents all individuals aged 18-85 years with a serum creatinine laboratory test performed at a government sector hospital or clinic between January 1, 2012, and January 1, 2016.

<sup>b</sup>Patients were classified as having 'Normal' CKD status if their first eGFR measure was  $\geq 60$  mL/min/1.73m<sup>2</sup>.

<sup>c</sup>CKD defined as two eGFR measurements <60 mL/min/1.73m<sup>2</sup> at least 90 days but no more than 12 months apart.

<sup>d</sup>Renal Insufficiency (RI) event defined as having an eGFR measure < 60 L/min/1.73m<sup>2</sup>.

Supplemental Table 2. Time (in months) between first and last CKD lab measure by CKD stage at first lab

| CKD stage at first lab                     | Measure         | CKD stage at last lab       |                         |                          |                          |                         |                          |
|--------------------------------------------|-----------------|-----------------------------|-------------------------|--------------------------|--------------------------|-------------------------|--------------------------|
|                                            |                 | Stage 1<br>(eGFR $\geq$ 90) | Stage 2<br>(eGFR 60-89) | Stage 3a<br>(eGFR 45-59) | Stage 3b<br>(eGFR 30-45) | Stage 4<br>(eGFR 15-29) | Stage 5<br>(eGFR $<$ 15) |
| <b>Stage 3a (eGFR 45-59)</b>               | Mean (SD)       | 13.7 (9.6)                  | 26.5 (14.6%)            | 32.8 (21.3)              | 32.9 (22.1)              | 30.0 (22.4)             | 26.6 (21.6)              |
|                                            | Median (Q1, Q3) | 10.3 (6.2, 21.3)            | 24.4 (15.8, 33.6)       | 34.3 (11.2, 48.1)        | 34.0 (10.6, 48.8)        | 26.0 (9.0, 47.3)        | 20.1 (7.8, 42.4)         |
| <b>Stage 3b (eGFR 30-44)</b>               | Mean (SD)       | 11.3 (8.6)                  | 26.7 (16.2)             | 31.3 (21.6)              | 30.8 (21.8)              | 30.1 (22.0)             | 28.9 (21.1)              |
|                                            | Median (Q1, Q3) | 7.3 (5.3, 15.7)             | 23.9 (13.9, 35.9)       | 32.0 (10.0, 47.4)        | 30.4 (9.7, 47.4)         | 27.2 (9.2, 47.5)        | 25.2 (9.5, 45.6)         |
| <b>Stage 4 (eGFR 15-29)</b>                | Mean (SD)       | 11.2 (7.8)                  | 25.4 (16.1)             | 31.6 (22.5)              | 28.5 (22.2)              | 25.8 (20.7)             | 26.1 (19.5)              |
|                                            | Median (Q1, Q3) | 8.9 (5.3, 12.7)             | 22.5 (12.7, 34.6)       | 32.4 (9.2, 48.0)         | 24.2 (7.9, 45.8)         | 18.8 (7.6, 42.6)        | 21.0 (0.1, 40.6)         |
| <b>Stage 5 (eGFR <math>&lt;</math> 15)</b> | Mean (SD)       | 11.2 (7.7)                  | 25.5 (15.6)             | 34.2 (23.6)              | 30.8 (23.3)              | 25.5 (22.2)             | 21.6 (20.3)              |
|                                            | Median (Q1, Q3) | 8.3 (4.6, 15.7)             | 23.9 (12.8, 34.2)       | 36.2 (9.8, 51.2)         | 30.0 (8.2, 49.2)         | 15.9 (6.2, 43.2)        | 12.1 (6.0, 33.4)         |

Supplemental Table 3. Transition between CKD stages from first creatine lab measure to last available creatinine lab measure among those with CKD at baseline, overall and by diabetes status.

| Overall                        |                                      |                                        |                                         |                                         |                                        |                                      |        |
|--------------------------------|--------------------------------------|----------------------------------------|-----------------------------------------|-----------------------------------------|----------------------------------------|--------------------------------------|--------|
|                                | CKD stage at last lab                |                                        |                                         |                                         |                                        |                                      |        |
| CKD stage at first lab         | Stage 1<br>(eGFR ≥90)<br>(%; 95% CI) | Stage 2<br>(eGFR 60-89)<br>(%; 95% CI) | Stage 3a<br>(eGFR 45-59)<br>(%; 95% CI) | Stage 3b<br>(eGFR 30-44)<br>(%; 95% CI) | Stage 4<br>(eGFR 15-29)<br>(%; 95% CI) | Stage 5<br>(eGFR <15)<br>(%; 95% CI) | Total  |
| Stage 3a (eGFR 45-59)          | 75<br>(0.2%; 0.1, 0.2)               | 7784<br>(20.1%; 19.7, 20.5)            | 16,033<br>(41.4%; 40.9, 41.8)           | 8124<br>(21.0%; 20.6, 21.4)             | 3853<br>(9.9%; 9.6, 10.2)              | 2901<br>(7.5%; 7.2, 7.7)             | 38,770 |
| Stage 3b (eGFR 30-44)          | 30<br>(0.1%; 0.08, 0.2)              | 2812<br>(11.0%; 10.7, 11.4)            | 6753<br>(26.5%; 26.0, 27.1)             | 7331<br>(28.8%; 28.2, 29.4)             | 5053<br>(19.9%; 19.4, 20.3)            | 3483<br>(13.7%; 13.3, 14.1)          | 25,462 |
| Stage 4 (eGFR 15-29)           | 17<br>(0.2%; 0.07, 0.2)              | 963<br>(6.9%; 6.4, 7.3)                | 1646<br>(11.7%; 11.2, 12.2)             | 2398<br>(17.1%; 16.4, 17.7)             | 4123<br>(29.3%; 28.6, 30.1)            | 4908<br>(34.9%; 34.1, 35.7)          | 14,055 |
| Stage 5 (eGFR <15)             | 12<br>(0.1%; 0.06, 0.2)              | 489<br>(4.9%; 4.5, 5.3)                | 758<br>(7.6%; 7.1, 8.1)                 | 725<br>(7.3%; 6.8, 7.8)                 | 1212<br>(12.1%; 11.5, 12.8)            | 6790<br>(68%; 67.1, 68.9)            | 9986   |
| People living with Diabetes    |                                      |                                        |                                         |                                         |                                        |                                      |        |
|                                | CKD stage at last lab                |                                        |                                         |                                         |                                        |                                      |        |
| CKD stage at first lab         | Stage 1<br>(eGFR ≥90)<br>(%; 95% CI) | Stage 2<br>(eGFR 60-89)<br>(%; 95% CI) | Stage 3a<br>(eGFR 45-59)<br>(%; 95% CI) | Stage 3b<br>(eGFR 30-44)<br>(%; 95% CI) | Stage 4<br>(eGFR 15-29)<br>(%; 95% CI) | Stage 5<br>(eGFR <15)<br>(%; 95% CI) | Total  |
| Stage 3a (eGFR 45-59)          | 2<br>(0.05%; 0.01, 0.2)              | 413<br>(9.5%; 8.7, 10.4)               | 1535<br>(35.4%; 34.0, 36.9)             | 1223<br>(28.2%; 26.9, 29.6)             | 697<br>(16.1%; 15.0, 17.2)             | 462<br>(10.7%; 9.8, 11.6)            | 4332   |
| Stage 3b (eGFR 30-44)          | 1<br>(0.03%; 0.00, 0.1)              | 164<br>(4.4%; 3.8, 5.1)                | 729<br>(19.6%; 18.3, 20.8)              | 1156<br>(31.0%; 29.5, 32.5)             | 1055<br>(28.3%; 26.7, 29.8)            | 624<br>(16.7%; 15.6, 18.0)           | 3729   |
| Stage 4 (eGFR 15-29)           | 1<br>(0.04%; 0.00, 0.2)              | 70<br>(3.1%; 2.4, 3.8)                 | 172<br>(7.6%; 6.5, 8.7)                 | 328<br>(14.5%; 13.1, 15.9)              | 799<br>(35.2%; 33.3, 37.2)             | 899<br>(39.6%; 37.6, 41.6)           | 2269   |
| Stage 5 (eGFR <15)             | 0<br>(0%; 0.00, 0.3)                 | 24<br>(2.5%; 1.6, 3.6)                 | 56<br>(5.8%; 4.4, 7.4)                  | 73<br>(7.5%; 6.0, 9.3)                  | 140<br>(14.4%; 12.3, 16.7)             | 680<br>(69.9%; 66.9, 72.7)           | 973    |
| People living without Diabetes |                                      |                                        |                                         |                                         |                                        |                                      |        |
|                                | CKD stage at last lab                |                                        |                                         |                                         |                                        |                                      |        |
| CKD stage at first lab         | Stage 1<br>(eGFR ≥90)<br>(%; 95% CI) | Stage 2<br>(eGFR 60-89)<br>(%; 95% CI) | Stage 3a<br>(eGFR 45-59)<br>(%; 95% CI) | Stage 3b<br>(eGFR 30-44)<br>(%; 95% CI) | Stage 4<br>(eGFR 15-29)<br>(%; 95% CI) | Stage 5<br>(eGFR <15)<br>(%; 95% CI) | Total  |
| Stage 3a (eGFR 45-59)          | 4<br>(0.1%; 0.04, 0.3)               | 485<br>(14.4%; 13.2, 15.6)             | 1442<br>(42.7%; 41.0, 44.4)             | 806<br>(23.9%; 22.4, 25.3)              | 396<br>(11.7%; 10.7, 12.8)             | 245<br>(7.3%; 6.4, 8.2)              | 3378   |
| Stage 3b (eGFR 30-44)          | 2<br>(0.08%; 0.01, 0.3)              | 192<br>(7.3%; 6.4, 8.4)                | 643<br>(24.5%; 22.9, 26.2)              | 855<br>(32.6%; 30.8, 34.4)              | 577<br>(22.0%; 20.5, 23.6)             | 352<br>(13.4%; 12.2, 14.8)           | 2621   |
| Stage 4 (eGFR 15-29)           | 3<br>(0.2%; 0.04, 0.4)               | 69<br>(3.8%; 3.0, 4.8)                 | 162<br>(8.9%; 7.7, 10.3)                | 291<br>(16.0%; 14.4, 17.8)              | 561<br>(30.9%; 28.8, 33.1)             | 728<br>(40.1%; 37.9, 42.4)           | 1814   |

|                     |                         |                        |                        |                         |                           |                             |      |
|---------------------|-------------------------|------------------------|------------------------|-------------------------|---------------------------|-----------------------------|------|
| Stage 5 (eGFR < 15) | 1<br>(0.1%; 0.002, 0.2) | 57<br>(2.6%; 2.0, 3.3) | 95<br>(4.3%; 3.5, 5.2) | 100<br>(4.5%; 3.7, 5.4) | 236<br>(10.6%; 9.4, 11.9) | 1733<br>(78.0%; 76.2, 79.7) | 2222 |
|---------------------|-------------------------|------------------------|------------------------|-------------------------|---------------------------|-----------------------------|------|

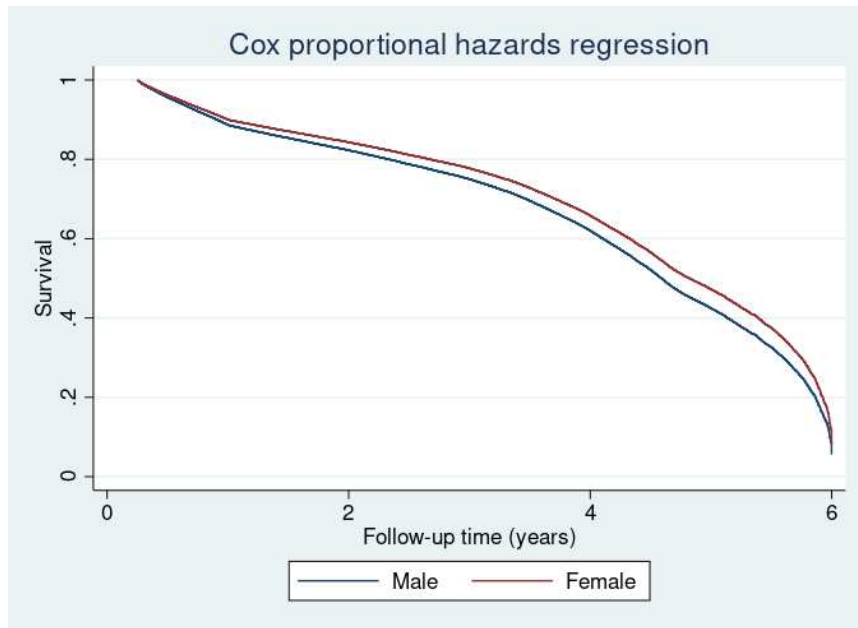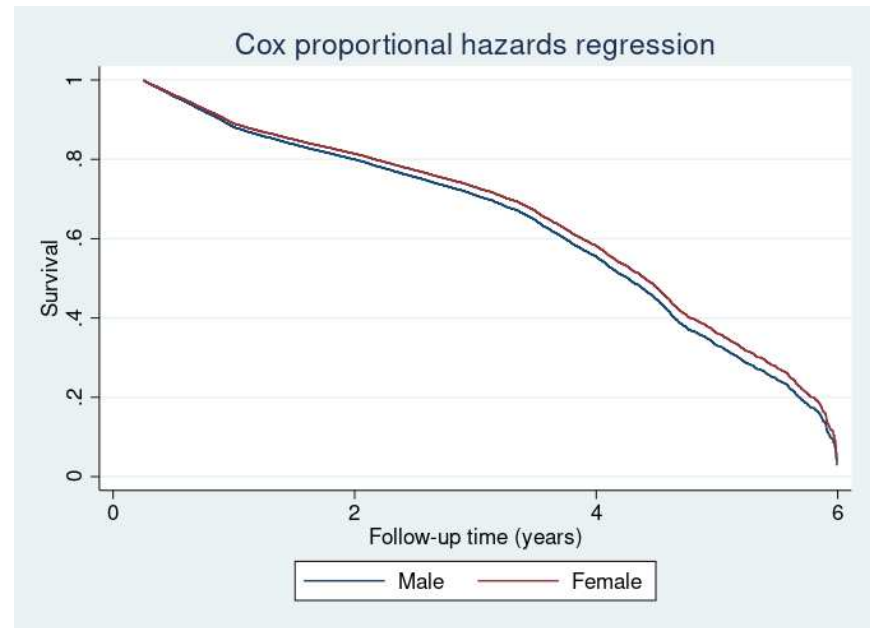

**Supplemental Figure 1.** Crude and adjusted survival functions for the Cox regression of time to CKD progression by sex. Adjusted estimates are adjusted for age, diabetes status, and HIV/TB status.

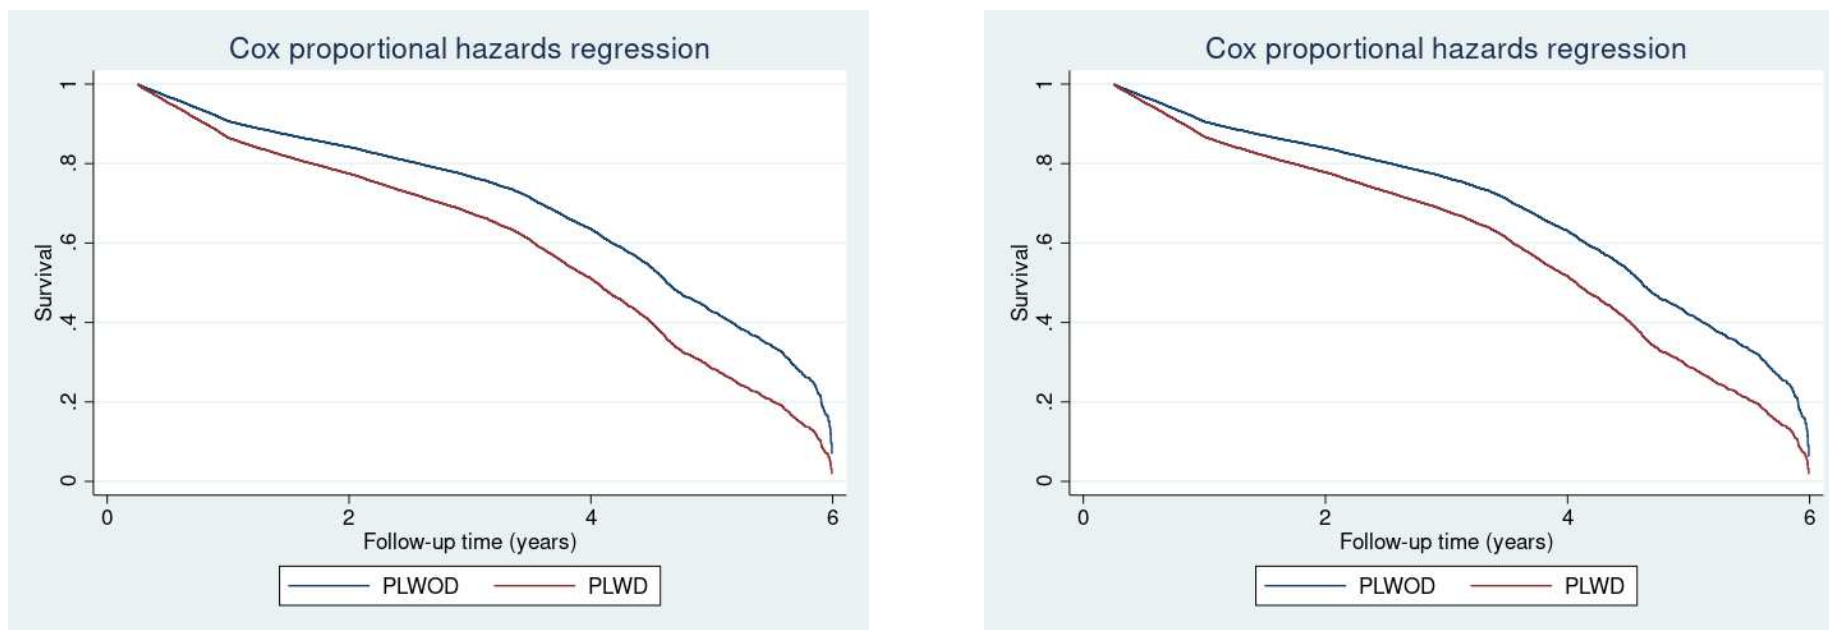

**Supplemental Figure 2.** Crude and adjusted survival functions for the Cox regression of time to CKD progression by diabetes status. Adjusted estimates are adjusted for sex, age, and HIV/TB status.

Abbreviations: PLWOD=people living without diabetes, PLWD=people living with diabetes.

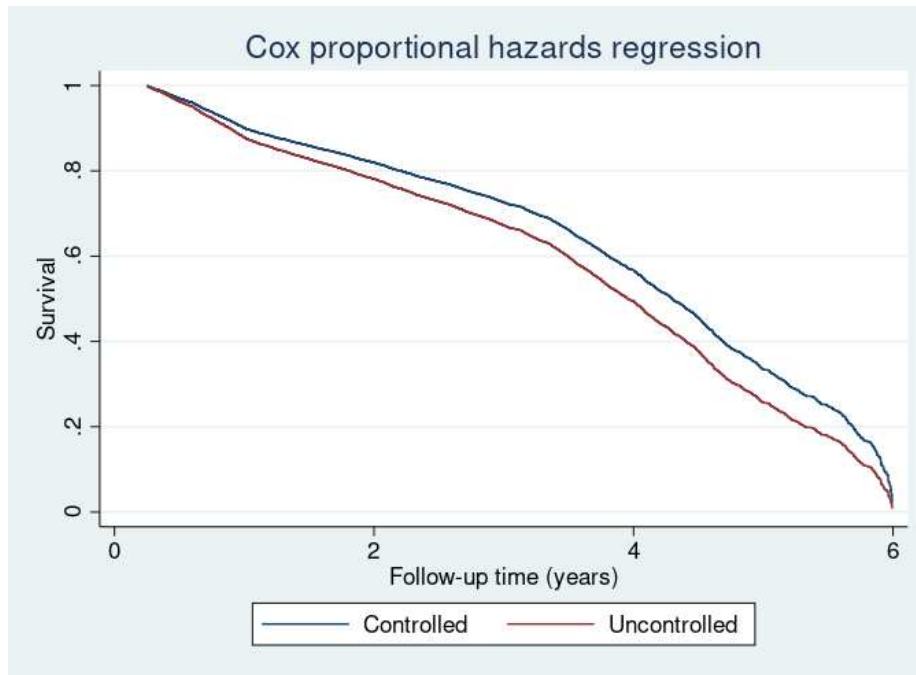

**Supplemental Figure 3.** Crude survival function for the Cox regression of time to CKD progression among patients with controlled diabetes ( $6.5\% \leq \text{HbA1c} \leq 7\%$ ) versus uncontrolled diabetes ( $\text{HbA1c} > 7\%$ ).

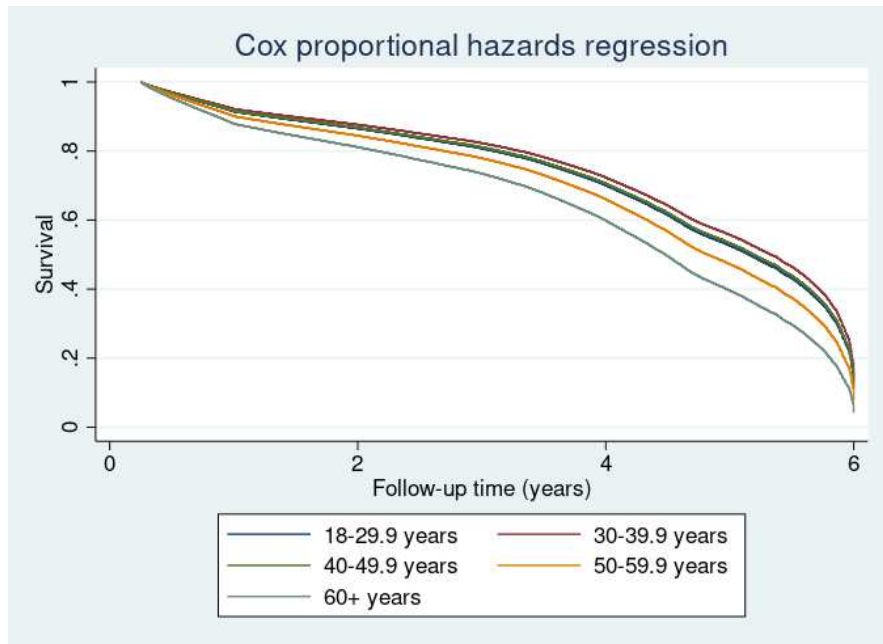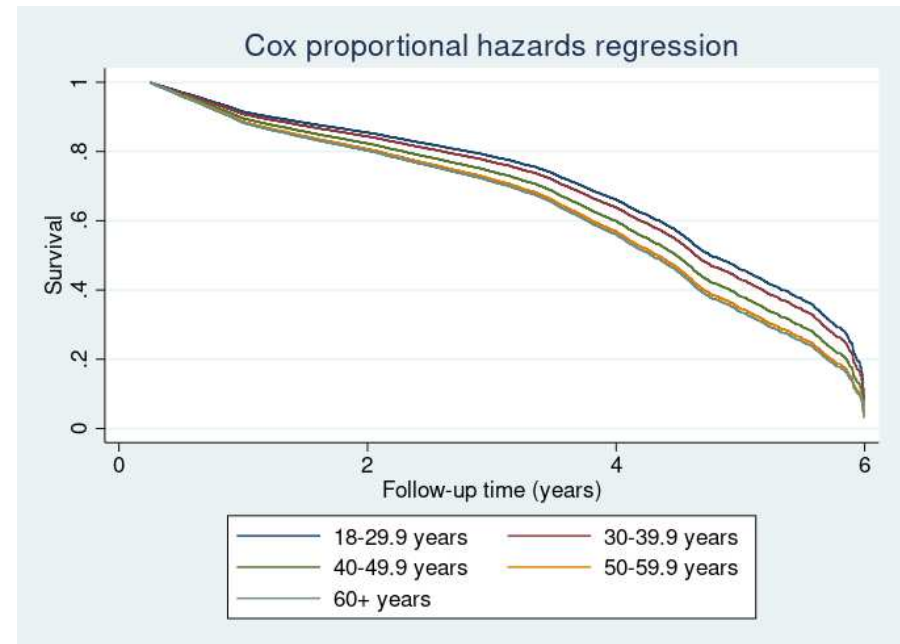

**Supplemental Figure 4.** Crude and adjusted survival functions for the Cox regression of time to CKD progression by age. Adjusted estimates are adjusted for sex, diabetes status, and HIV/TB status.



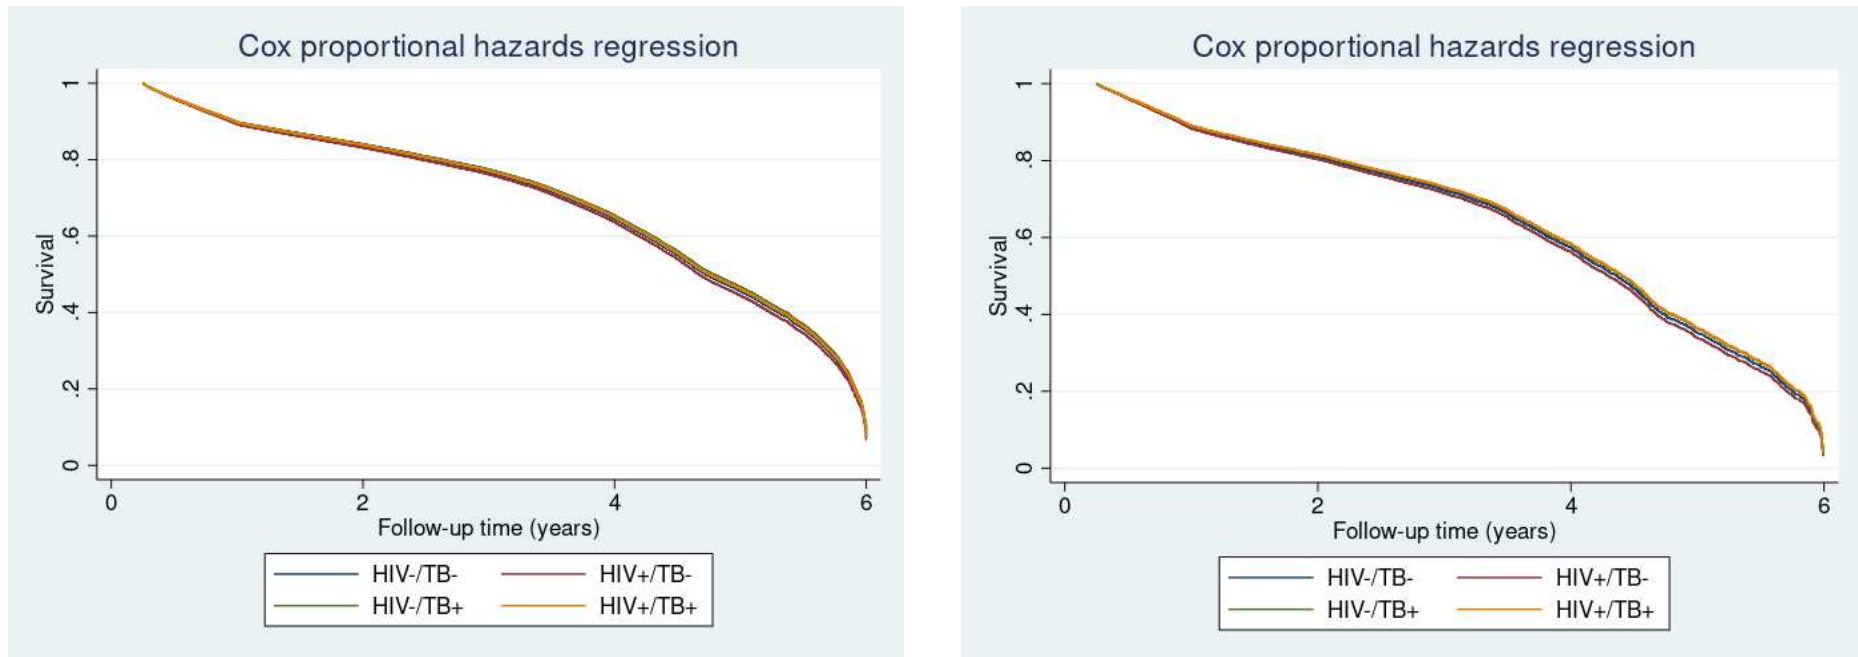

**Supplemental Figure 5.** Crude and adjusted survival functions for the Cox regression of time to CKD progression by HIV/TB status. Adjusted estimates are adjusted for sex, age, and diabetes status.

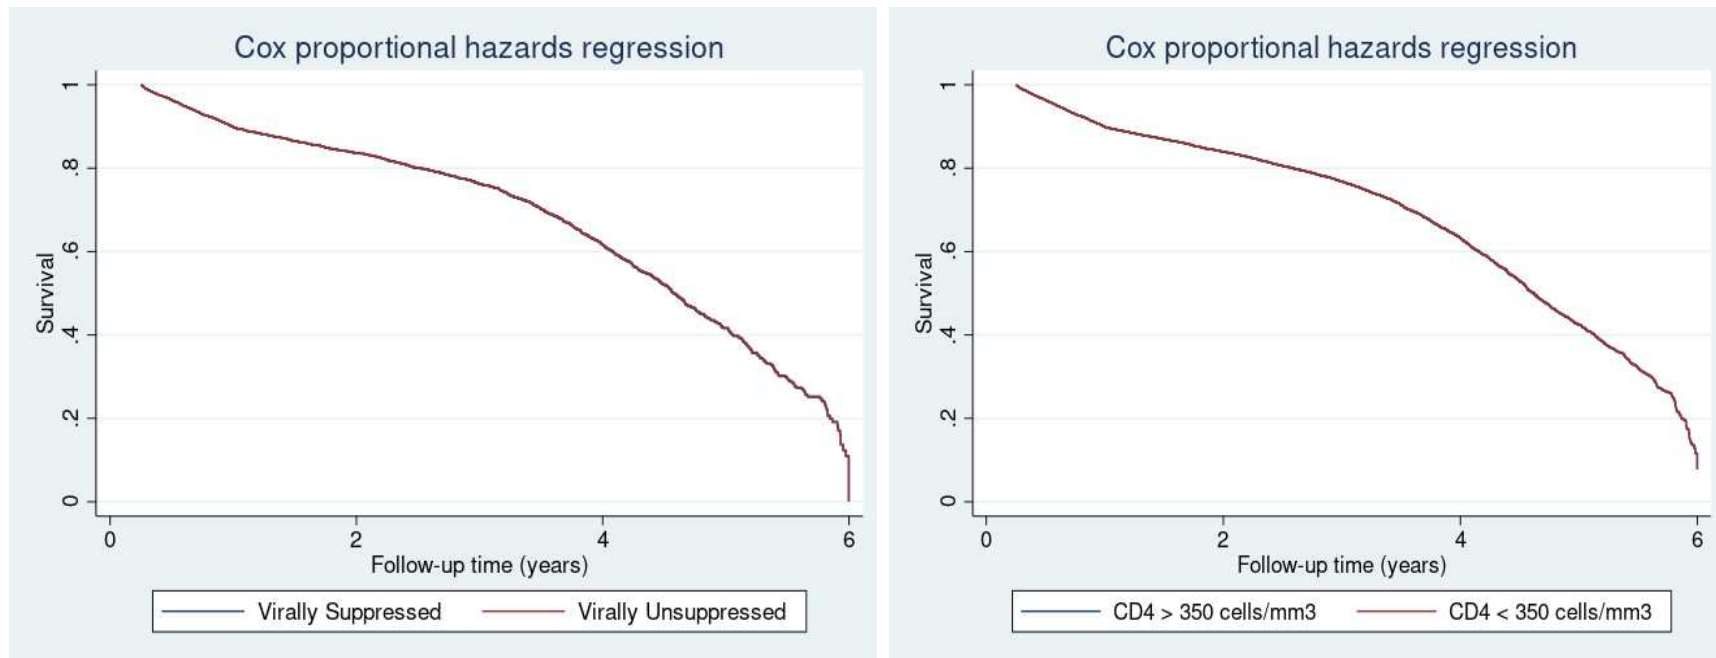

**Supplemental Figure 6.** Crude and adjusted survival functions for the Cox regression of time to CKD progression by markers of HIV disease severity.
